# Supplementary material for: Hierarchical generative modelling for autonomous robots
Source: Research Square preprint supplement (doi:10.21203/rs.3.rs-965852/v1), 2021-11-15
Supplement: Supplementary file 1 [file 125ba5ff6c446510466a8eb9.pdf]

## SUPPLEMENTARY INFORMATION

---

### **Hierarchical generative modelling for autonomous robots**

Kai Yuan<sup>1,3</sup>, Noor Sajid<sup>2,3</sup>, Karl Friston<sup>2</sup> and Zhibin Li<sup>1\*</sup>

<sup>1</sup>Edinburgh Centre for Robotics, The University of Edinburgh, UK

<sup>2</sup>Wellcome Centre for Human Neuroimaging, Queen Square Institute of Neurology, University College London, UK

<sup>3</sup>These authors contributed equally

\* Corresponding author: [zhibin.li@ed.ac.uk](mailto:zhibin.li@ed.ac.uk)

|                | Lower joint position<br>[rad] | Upper joint position<br>[rad] | Joint velocity<br>[rad/s] | Joint torque<br>[Nm] |
|----------------|-------------------------------|-------------------------------|---------------------------|----------------------|
| Shoulder roll  | -1.3                          | 1.5                           | 5.9                       | 190                  |
| Shoulder pitch | -2.9                          | 2.0                           | 5.9                       | 190                  |
| Shoulder yaw   | -3.1                          | 2.2                           | 11.6                      | 65                   |
| Elbow pitch    | -2.2                          | 0.1                           | 11.5                      | 65                   |
| Torso roll     | -0.2                          | 0.3                           | 9.0                       | 150                  |
| Torso pitch    | -0.1                          | 0.7                           | 9.0                       | 150                  |
| Torso yaw      | -1.3                          | 1.2                           | 5.9                       | 190                  |
| Hip Roll       | -0.6                          | 0.5                           | 7.0                       | 350                  |
| Hip pitch      | -2.4                          | 1.6                           | 6.1                       | 350                  |
| Hip yaw        | -0.4                          | 1.1                           | 5.9                       | 190                  |
| Knee pitch     | -0.1                          | 2.1                           | 6.1                       | 350                  |
| Ankle Pitch    | -0.9                          | 0.7                           | 11                        | 205                  |
| Ankle Roll     | -0.4                          | 0.4                           | 11                        | 205                  |

**Table S1:** Mechanical specifications of Valkyrie.

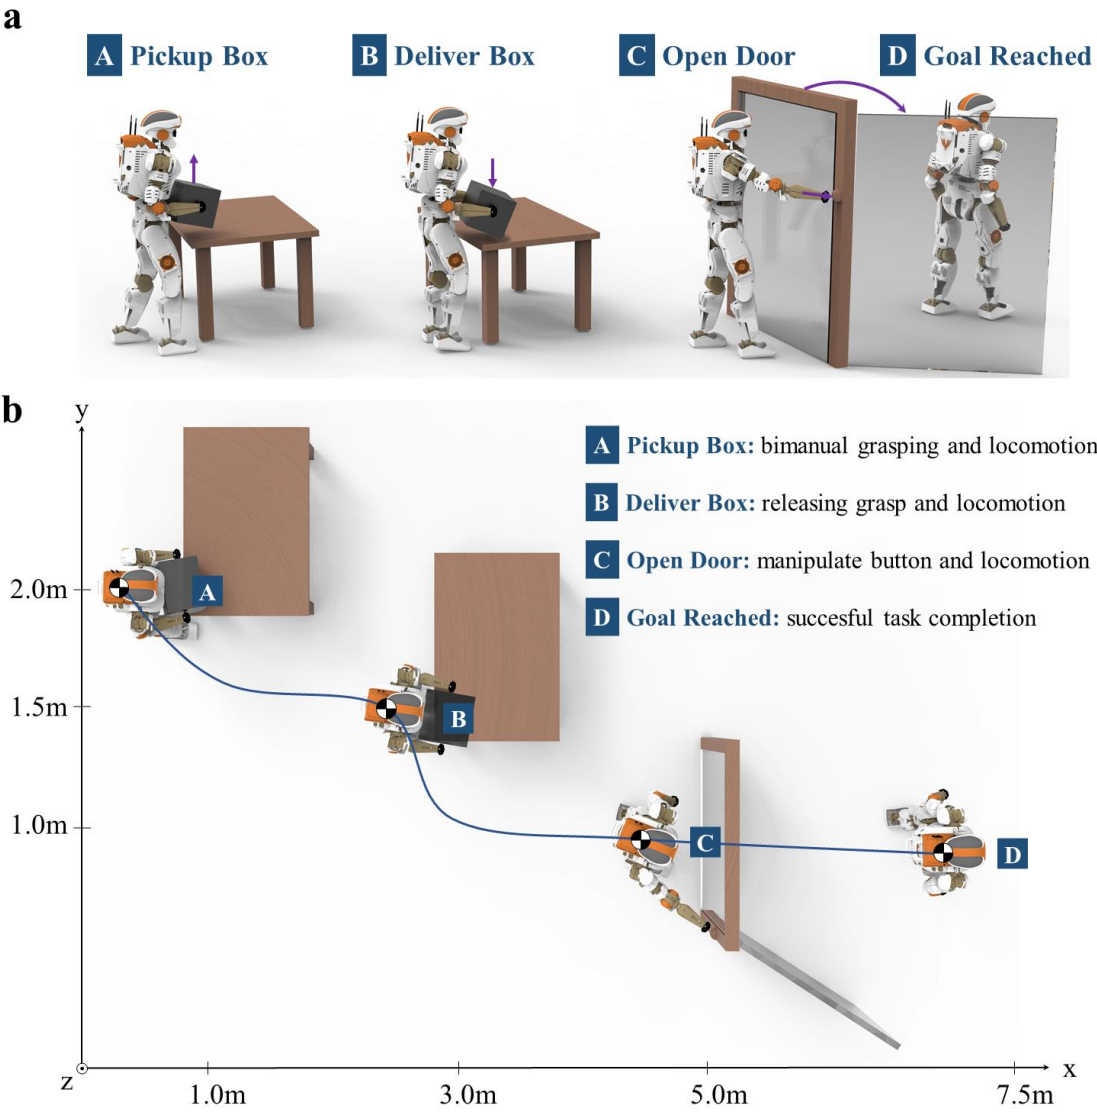

**Figure S1:** Visual presentation of the robot task: pick up a box, deliver it to the second table, approach the door, press the button to open the door, and enter the destination once the door opens fully. (a) shows the side view of the task; (b) shows the top-down view with x-y coordinates in Cartesian space.

|       | $w_1$ | $w_2$ | $w_3$ | $w_4$ | $w_5$ | $w_6$ |
|-------|-------|-------|-------|-------|-------|-------|
| Value | 1     | 0.1   | 1     | 2     | 2     | 5     |

**Table S2:** Weights for high-level reward

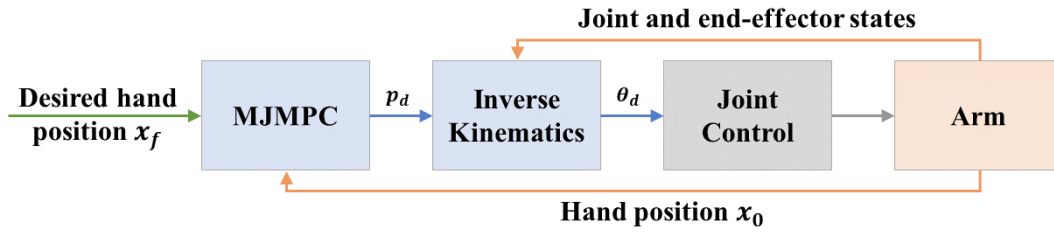

**Figure S2:** Control diagram of the manipulation policy. The Minimum Jerk Model-Predictive Control scheme provides a Cartesian space trajectory which is transformed into the joint space by Inverse Kinematics.

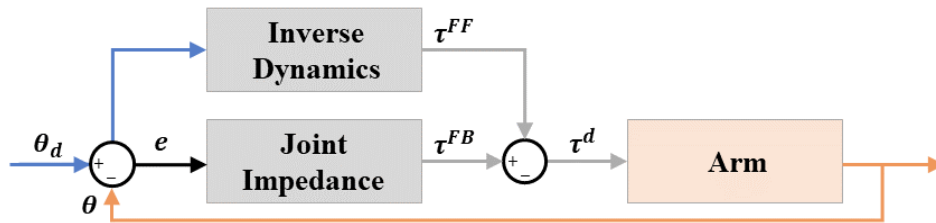

**Figure S3:** Dual-loop control structure for low-level joint control: Inverse Dynamics (feedforward) loop and Joint Impedance Control (feedback).
